# Supplementary material for: Identification of children with chronic kidney disease through school urinary screening using urinary protein/creatinine ratio measurement: an observational study
Source: Clin Exp Nephrol. 2020 Jan 31;24(5):450–7. doi: 10.1007/s10157-020-01852-5 (PMC7174251; doi:10.1007/s10157-020-01852-5)
Supplement: Supplementary file 1 — Calculation of the number of junior high and elementary school students screened. The rectangles denote changes in the numbers of junior high (dark blue) and elementary (light blue) school students who submitted urine samples between 2012 and 2018. The vertical and horizontal axes represent the year of birth and year of examination, respectively. The number of students screened was estimated for each year of birth. These numbers are shown in italicized red text in the rightmost column (PDF 2735 kb) [file 10157_2020_1852_MOESM1_ESM.pdf]

| Examination year | 2012 | 2013 | 2014 | 2015 | 2016 | 2017 | 2018 | Estimated students number<br>in each year of birth |
|------------------|------|------|------|------|------|------|------|----------------------------------------------------|
| Year of birth    |      |      |      |      |      |      |      |                                                    |
| 1997             | 2500 |      |      |      |      |      |      | 833.3                                              |
| 1998             |      | 3047 |      |      |      |      |      | 1015.7                                             |
| 1999             |      |      | 2993 |      |      |      |      | 1006.6                                             |
| 2000             | 5356 |      |      | 2918 |      |      |      | 995.2                                              |
| 2001             |      | 6094 |      |      | 2911 |      |      | 989.0                                              |
| 2002             |      |      | 5961 |      |      | 2865 |      | 981.4                                              |
| 2003             |      |      |      | 5899 |      |      | 2765 | 973.2                                              |
| 2004             |      |      |      |      | 5811 |      |      | 972.9                                              |
| 2005             |      |      |      |      |      | 5843 |      | 976.0                                              |
| 2006             |      |      |      |      |      |      | 5856 | 985.1                                              |
| 2007             |      |      |      |      |      |      |      | 979.0                                              |
| 2008             |      |      |      |      |      |      |      | 975.3                                              |
| 2009             |      |      |      |      |      |      |      | 972.8                                              |
| 2010             |      |      |      |      |      |      |      | 974.9                                              |
| 2011             |      |      |      |      |      |      |      | 976.0                                              |
|                  |      |      |      |      |      |      |      |                                                    |
